# Supplementary material
Source: HighWire-hosted journal article supplement (https://jnnp.bmj.com/content/jnnp-2018-318288)
Supplement: inline-supplementary-material-2 [file inline-supplementary-material-2.pdf]

**Supplementary table 1. All *TRIM32* variants detected in the MYO-SEQ cohort of patients with unexplained proximal muscle weakness.**

| Patient | Location                 |                | Genotype | Variant | Predicted deleteriousness |                 |           | ClinVar    | ExAC v3 allele frequency | ACMG    |
|---------|--------------------------|----------------|----------|---------|---------------------------|-----------------|-----------|------------|--------------------------|---------|
|         | hg19 co-ordinates (chr9) | Protein change |          |         | PolyPhen-2                | MutationTaster2 | FATHMM    |            |                          |         |
| 1       | 119460027                | -              | Het.     | Syn.    | No data                   | No data         | No data   | No data    | 0.00029                  | No data |
| 2       | 119460338                | p.Arg106His    | Het.     | Mis.    | Probably damaging         | Disease-causing | Tolerated | No data    | 0.00000                  | No data |
| 3       | 119460351                | -              | Het.     | Syn.    | No data                   | No data         | No data   | No data    | 0.00003                  | No data |
| 4       | 119460425                | p.Thr135Ile    | Het.     | Mis.    | Benign                    | Disease-causing | Tolerated | No data    | 0.00021                  | No data |
| 6       | 119460518                | p.Arg166Gln    | Het.     | Mis.    | Benign                    | Disease-causing | Tolerated | No data    | 0.00004                  | No data |
| 7       | 119460542                | p.Ser174Phe    | Het.     | Mis.    | Benign                    | Disease-causing | Tolerated | No data    | 0.00017                  | No data |
| 8       | 119460542                | p.Ser174Phe    | Het.     | Mis.    | Benign                    | Disease-causing | Tolerated | No data    | 0.00017                  | No data |
| 9       | 119460542                | p.Ser174Phe    | Het.     | Mis.    | Benign                    | Disease-causing | Tolerated | No data    | 0.00017                  | No data |
| 11      | 119460579                | p.Gln186His    | Het.     | Mis.    | Possibly damaging         | Disease-causing | Tolerated | Uncertain  | 0.00205                  | No data |
| 12      | 119460579                | p.Gln186His    | Het.     | Mis.    | Possibly damaging         | Disease-causing | Tolerated | Uncertain  | 0.00205                  | No data |
| 13      | 119460579                | p.Gln186His    | Het.     | Mis.    | Possibly damaging         | Disease-causing | Tolerated | Uncertain  | 0.00205                  | No data |
| 17      | 119460922                | p.Val301Ile    | Het.     | Mis.    | Benign                    | Disease-causing | Damaging  | No data    | 0.00000                  | No data |
| 19      | 119461113                | p.Lys364Asn    | Het.     | Mis.    | Possibly damaging         | Disease-causing | Damaging  | No data    | 0.00000                  | No data |
| 20      | 119461212                | -              | Het.     | Syn.    | No data                   | No data         | No data   | No data    | 0.00002                  | No data |
| 21      | 119461217                | p.Thr399Ile    | Het.     | Mis.    | Benign                    | Disease-causing | Damaging  | No data    | 0.00000                  | No data |
| 22      | 119461243                | p.Arg408Cys    | Het.     | Mis.    | Possibly damaging         | Disease-causing | Damaging  | Uncertain  | 0.00143                  | No data |
| 23      | 119461243                | p.Arg408Cys    | Het.     | Mis.    | Possibly damaging         | Disease-causing | Damaging  | Uncertain  | 0.00143                  | No data |
| 24      | 119461244                | p.Arg408His    | Het.     | Mis.    | Benign                    | Disease-causing | Damaging  | No data    | 0.00008                  | No data |
| 25      | 119461407                | -              | Het.     | Syn.    | No data                   | No data         | No data   | No data    | 0.00002                  | No data |
| 26      | 119461478                | p.Thr486Ile    | Het.     | Mis.    | Benign                    | Disease-causing | Tolerated | No data    | 0.00000                  | No data |
| 29      | 119461480                | p.Asp487Asn    | Het.     | Mis.    | Probably damaging         | Disease-causing | Damaging  | Pathogenic | 0.00000                  | No data |
| 30      | 119461480                | p.Asp487Asn    | Het.     | Mis.    | Probably damaging         | Disease-causing | Damaging  | Pathogenic | 0.00000                  | No data |
| 31      | 119461480                | p.Asp487Asn    | Het.     | Mis.    | Probably damaging         | Disease-causing | Damaging  | Pathogenic | 0.00000                  | No data |
| 32      | 119461480                | p.Asp487Asn    | Het.     | Mis.    | Probably damaging         | Disease-causing | Damaging  | Pathogenic | 0.00000                  | No data |
| 33      | 119461792                | p.Val591Met    | Het.     | Mis.    | Probably damaging         | Disease-causing | Damaging  | No data    | 0.00002                  | No data |
| 34      | 119461792                | p.Val591Met    | Het.     | Mis.    | Probably damaging         | Disease-causing | Damaging  | No data    | 0.00002                  | No data |

**Supplementary 1. All *TRIM32* variants detected in the MYO-SEQ cohort of patients with unexplained proximal muscle weakness (continued).**

| Patient | Location                 |                    | Genotype | Variant | Predicted deleteriousness |                 |           | ClinVar    | ExAC v3 allele frequency | ACMG              |
|---------|--------------------------|--------------------|----------|---------|---------------------------|-----------------|-----------|------------|--------------------------|-------------------|
|         | hg19 co-ordinates (chr9) | Protein change     |          |         | PolyPhen-2                | MutationTaster2 | FATHMM    |            |                          |                   |
| 5       | 119460478                | p.Arg155AsnfsTer29 | Hom.     | FS      | No data                   | Disease-causing | No data   | No data    | 0.00000                  | Pathogenic        |
| 5*      | 119460733                | p.Arg238Cys        | Hom.     | Mis.    | Probably damaging         | Disease-causing | Damaging  | No data    | 0.00002                  | VUS               |
| 10*     | 119460579                | p.Gln186His        | Hom.     | Mis.    | Possibly damaging         | Disease-causing | Tolerated | Uncertain  | 0.00205                  | VUS               |
| 14      | 119460593                | p.Glu192GlyfsTer7  | Het.     | FS      | No data                   | Disease-causing | No data   | No data    | 0.00000                  | Pathogenic        |
| 14      | 119461184                | p.Ala388Val        | Het.     | Mis.    | Possibly damaging         | Disease-causing | Tolerated | No data    | 0.00000                  | Pathogenic        |
| 15      | 119460593                | p.Glu192GlyfsTer7  | Het.     | FS      | No data                   | Disease-causing | No data   | No data    | 0.00000                  | Pathogenic        |
| 15      | 119461184                | p.Ala388Val        | Het.     | Mis.    | Possibly damaging         | Disease-causing | Tolerated | No data    | 0.00000                  | Pathogenic        |
| 16†     | 119460893                | p.Ile291Ser        | Hom.     | Mis.    | Benign                    | Disease-causing | Damaging  | No data    | 0.00000                  | VUS               |
| 18*     | 119460944                | p.Ala308Val        | Het.     | Mis.    | Benign                    | Disease-causing | Damaging  | No data    | 0.00001                  | VUS               |
| 18      | 119461222                | p.Lys401Ter        | Het.     | Stop    | No data                   | Disease-causing | No data   | No data    | 0.00001                  | Pathogenic        |
| 27      | 119461480                | p.Asp487Asn        | Hom.     | Mis.    | Probably damaging         | Disease-causing | Damaging  | Pathogenic | 0.00000                  | Pathogenic        |
| 28      | 119461480                | p.Asp487Asn        | Hom.     | Mis.    | Probably damaging         | Disease-causing | Damaging  | Pathogenic | 0.00000                  | Pathogenic        |
| 35      | 119461807                | p.Arg596Gly        | Hom.     | Mis.    | Possibly damaging         | Disease-causing | Damaging  | No data    | 0.00001                  | Likely pathogenic |
| 36      | 119461858                | p.Arg613Ter        | Het.     | Stop    | No data                   | Disease-causing | No data   | No data    | 0.00006                  | Pathogenic        |
| 36      | 119453455-119516944      | 63.5 kb deletion   | Het.     | CNV     | No data                   | No data         | No data   | No data    | No data                  | Pathogenic        |

**Upper panel:** MYO-SEQ patients with single heterozygous rare *TRIM32* variants. **Lower panel:** MYO-SEQ patients with non-synonymous homozygous or compound heterozygous rare variants in *TRIM32*. Het., heterozygous; Hom., homozygous; Syn., synonymous; Mis., missense; FS, frameshift; Stop, stop gained; CNV, copy number variation; VUS, variant of unknown significance.

\* Phenotype explained by other variant(s).

† Variant of unknown significance, no candidate variant(s) in other known myopathy genes identified.
