# Supplementary material
Source: HighWire-hosted journal article supplement (https://jnnp.bmj.com/content/jnnp-2018-318288)
Supplement: inline-supplementary-material-3 [file inline-supplementary-material-3.pdf]

**Supplementary table 2. Phenotypic information for the patients harbouring *TRIM32* pathogenic variants or variants of unknown significance.**

|                             | Patient 5                                                    | Patient 14                                                | Patient 15                                       | Patient 27                                             | Patient 28                       | Patient 35                       | Patient 36                                                         | Patient 37                                | Patient 39                 |                        |
|-----------------------------|--------------------------------------------------------------|-----------------------------------------------------------|--------------------------------------------------|--------------------------------------------------------|----------------------------------|----------------------------------|--------------------------------------------------------------------|-------------------------------------------|----------------------------|------------------------|
| <b>Sex</b>                  | Male                                                         | Female                                                    | Female                                           | Male                                                   | Female                           | Female                           | Female                                                             | Male                                      | Female                     |                        |
| <b>Ethnicity</b>            | Turkish                                                      | Belgian                                                   | Belgian                                          | Bosnian Serb                                           | Serbian                          | Italian                          | Polish                                                             | British                                   | British                    |                        |
| <b>Variant(s)</b>           | p.Arg155Asnfs<br>Ter29                                       | p.Glu192Glyfs<br>Ter7                                     | p.Glu192Glyfs<br>Ter7                            | p.Asp487Asn                                            | p.Asp487Asn                      | p.Arg596Gly                      | p.Arg613Ter                                                        | p.Ala231Glnfs<br>Ter21                    | p.Arg394His                |                        |
|                             | p.Arg155Asnfs<br>Ter29                                       | p.Ala388Val                                               | p.Ala388Val                                      | p.Asp487Asn                                            | p.Asp487Asn                      | p.Arg596Gly                      | 63.5 kb<br>deletion                                                | p.Met370Cysfs<br>Ter10                    | p.Arg394His                |                        |
| <b>Region</b>               | Coiled-coil                                                  | Coiled-coil,<br>NHL repeats                               | Coiled-coil,<br>NHL repeats                      | NHL repeats                                            | NHL repeats                      | NHL repeats                      | NHL repeats                                                        | Intervening,<br>NHL repeats               | NHL repeats                |                        |
| <b>Onset, y</b>             | 10                                                           | 30                                                        | 30                                               | 28                                                     | 25                               | 14                               | 34                                                                 | Early 30s                                 | 45                         |                        |
| <b>Last exam, y</b>         | 40                                                           | 56                                                        | 48                                               | 38                                                     | 54                               | 42                               | 45                                                                 | 42                                        | 53                         |                        |
| <b>Presenting symptoms</b>  | Proximal weakness, waddling gait, difficulty climbing stairs | Exercise intolerance, difficulty climbing stairs, myalgia | Exercise intolerance, difficulty climbing stairs | Fatigue, gait difficulties, lower limb cramps, myalgia | Lower limb weakness, back pain   | Scoliosis, joint laxity          | Proximal lower and upper limb weakness, difficulty climbing stairs | Waddling gait, difficulty climbing stairs | Proximal weakness, myalgia |                        |
| <b>Serum CK (U/l)</b>       | ↑ (1 450)                                                    | ↑ (802)                                                   | ↑ (443)                                          | ↑ (1 189)                                              | ↑ (276)                          | ↑ (≤ 2 000)                      | ↑ (317)                                                            | ↑ (1 844)                                 | ↑ (500)                    |                        |
| <b>Weakness</b>             | <b>Proximal UL</b>                                           | Yes                                                       | Yes                                              | No                                                     | Yes                              | Yes                              | Mild                                                               | Yes                                       | No                         | Yes                    |
|                             | <b>Proximal LL</b>                                           | Yes                                                       | Yes                                              | Yes                                                    | Yes                              | Yes                              | Yes                                                                | Yes                                       | Yes                        | Yes                    |
|                             | <b>Distal UL</b>                                             | No                                                        | No                                               | No                                                     | Yes                              | No                               | Mild                                                               | No                                        | No                         | No                     |
|                             | <b>Distal LL</b>                                             | Yes                                                       | Yes                                              | Yes                                                    | Yes                              | Yes                              | No                                                                 | No                                        | Yes                        | No                     |
|                             | <b>Other</b>                                                 | Mild facial                                               | Abdominal, paraspinal                            | Abdominal, paraspinal                                  | Abdominal, mild facial, scapular | Abdominal, mild facial, scapular | Paraspinal                                                         | Abdominal                                 | No                         | Neck flexors, scapular |
| <b>Ambulatory aid, y</b>    | Wheelchair, 30                                               | Wheelchair, 48                                            | Wheelchair, 46                                   | None                                                   | Wheelchair, 53                   | Cane, mid-30s                    | None                                                               | None                                      | Unilateral, 50             |                        |
| <b>FVC (% of predicted)</b> | ND                                                           | 105                                                       | 103                                              | Normal                                                 | 109                              | 82                               | 109                                                                | 104                                       | 100                        |                        |
| <b>Echocardiography</b>     | Normal                                                       | Normal                                                    | Mildly aberrant contraction pattern              | Normal                                                 | Normal                           | Minor atrial septal aneurysm     | Slight regurgitation of mitral and tricuspid valve                 | Normal                                    | Normal                     |                        |
| <b>Biopsy, y</b>            | Myopathic, 39                                                | Dystrophic, 40                                            | Dystrophic, 36                                   | Dystrophic, 30                                         | Myopathic, 30                    | Myopathic, 14                    | Myopathic, 42                                                      | Dystrophic, 39                            | Myopathic, 45              |                        |
| <b>Vacuoles</b>             | No                                                           | No                                                        | Scattered fibers                                 | Scattered fibers                                       | No                               | No                               | No                                                                 | No                                        | Scattered fibers           |                        |

**Supplementary table 2. Phenotypic information for the patients harbouring *TRIM32* pathogenic variants or variants of unknown significance (continued).**

|                             | <b>Patient 16</b>                              | <b>Patient 38</b>                          | <b>Patient 40</b>                                                |          |
|-----------------------------|------------------------------------------------|--------------------------------------------|------------------------------------------------------------------|----------|
| <b>Sex</b>                  | Female                                         | Male                                       | Male                                                             |          |
| <b>Ethnicity</b>            | Persian                                        | Pakistani                                  | Persian                                                          |          |
| <b>Variant(s)</b>           | p.Ile291Ser                                    | p.Leu163Pro                                | p.Leu163Pro                                                      |          |
|                             | p.Ile291Ser                                    | p.Leu163Pro                                | p.Leu163Pro                                                      |          |
| <b>Region</b>               | Intervening                                    | Coiled-coil                                | Coiled-coil                                                      |          |
| <b>Onset, y</b>             | 19                                             | 3                                          | 32                                                               |          |
| <b>Last exam, y</b>         | 48                                             | 21                                         | 40                                                               |          |
| <b>Presenting symptoms</b>  | Proximal muscle weakness, exercise intolerance | Difficulty rising from sitting and walking | Proximal lower limb weakness, myalgia, mild exercise intolerance |          |
| <b>Serum CK (U/l)</b>       | Normal (120)                                   | ↑ (6 500)                                  | ↑ (398)                                                          |          |
| <b>Weakness</b>             | <b>Proximal UL</b>                             | Yes                                        | Yes                                                              | No       |
|                             | <b>Proximal LL</b>                             | Yes                                        | Yes                                                              | Yes      |
|                             | <b>Distal UL</b>                               | Yes                                        | No                                                               | No       |
|                             | <b>Distal LL</b>                               | Yes                                        | No                                                               | No       |
|                             | <b>Other</b>                                   | No                                         | Facial, scapular                                                 | Scapular |
| <b>Ambulatory aid, y</b>    | Bilateral, 42                                  | One crutch, 20                             | None                                                             |          |
| <b>FVC (% of predicted)</b> | 92                                             | Normal                                     | 97                                                               |          |
| <b>Echocardiography</b>     | Normal                                         | Normal                                     | Normal                                                           |          |
| <b>Biopsy, y</b>            | Myopathic, 40                                  | Myopathic, 15                              | Dystrophic, 39                                                   |          |
| <b>Vacuoles</b>             | Scattered fibers                               | No                                         | Scattered fibers                                                 |          |

**Upper panel:** patients with pathogenic *TRIM32* variants. **Lower panel:** patients with a variant of unknown significance in *TRIM32*. VUS, variant of unknown significance; y, age in years; CK, creatine kinase; ↑, increased; UL, upper limbs; LL, lower limbs; FVC, forced vital capacity; ND, not done
